# Supplementary material for: Pharyngeal Pumping and Tissue-Specific Transgenic P-Glycoprotein Expression Influence Macrocyclic Lactone Susceptibility in Caenorhabditis elegans
Source: Pharmaceuticals (Basel). 2021 Feb 13;14(2):153. doi: 10.3390/ph14020153 (PMC7917992; doi:10.3390/ph14020153)
Supplement: Supplementary file 1 [file pharmaceuticals-14-00153-s001.pdf]

**Pharyngeal pumping and tissue-specific transgenic P-glycoprotein expression influence macrocyclic lactone susceptibility in *Caenorhabditis elegans***

**Alexander P. Gerhard<sup>1</sup>, Jürgen Krücken<sup>1</sup>, Cedric Neveu<sup>2</sup>, Claude L. Charvet<sup>2</sup>, Abdallah Harmache<sup>2</sup>, Georg von Samson-Himmelstjerna<sup>1</sup>**

<sup>1</sup>Institute for Parasitology and Tropical Veterinary Medicine, Freie Universität Berlin, Germany

<sup>2</sup>INRAE, Université de Tours, ISP, F-37380, Nouzilly, France

\* Correspondence:

samson.georg@fu-berlin.de

**Supplementary Files**

**Supplementary Figure 1** Concentration-response curves for Intestine-Pgp-9 Line 2, wildtype and control strain

**Supplementary Figure 2.** All concentration-response curves of *Parascaris univalens* Pgp-9 expressing transgenic including both control and wildtype strains to ivermectin and moxidectin

**Supplementary Figure 3** Vector maps of expression vectors

**Supplementary Table 1** Ivermectin concentration-response parameters of transgenic, control and wildtype strains at different conditions

**Supplementary Table 2** Moxidectin concentration-response parameters of transgenic, control and wildtype strains at different conditions

**Supplementary Table 3** Primers

**a**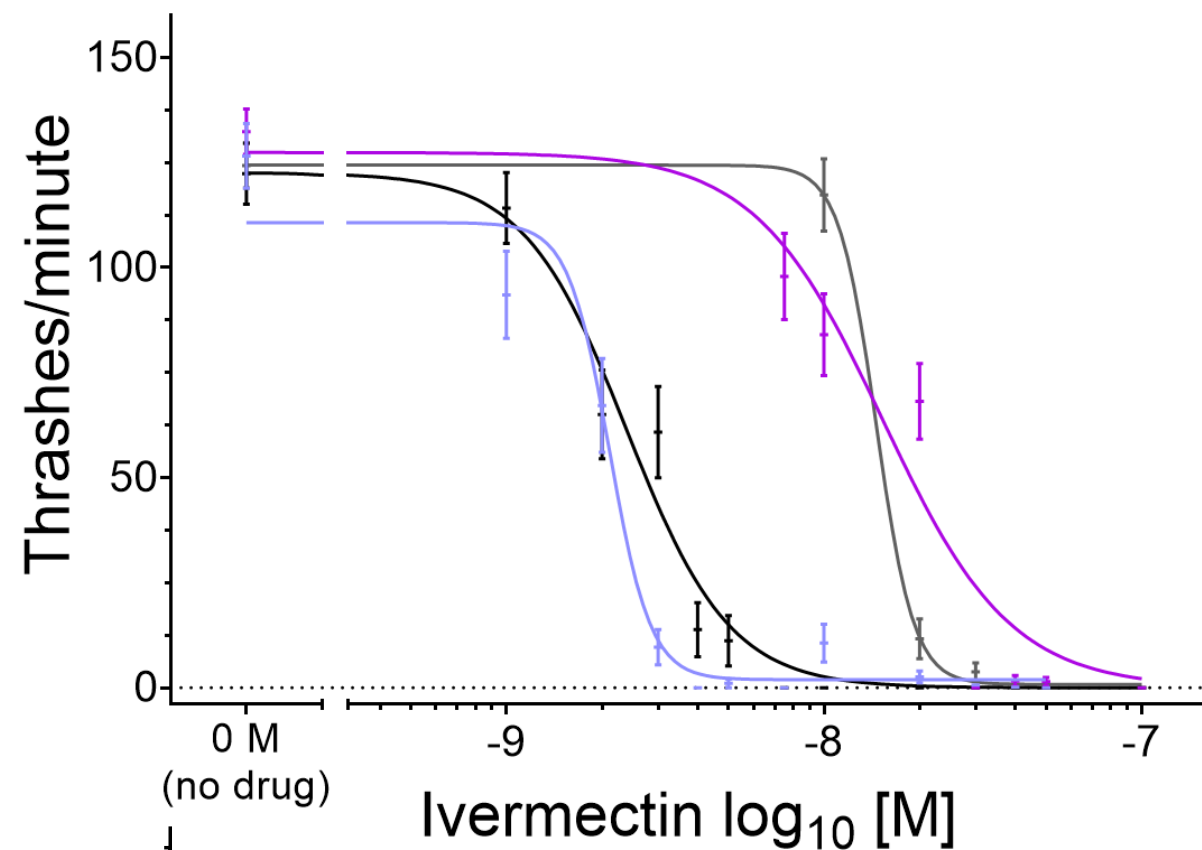**b**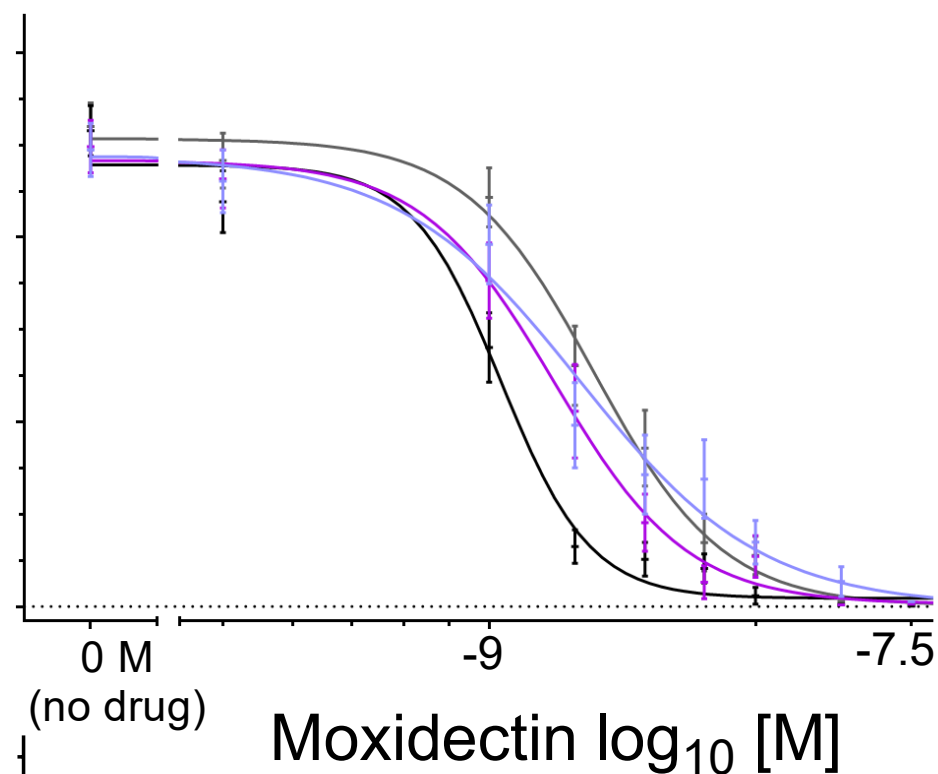**c**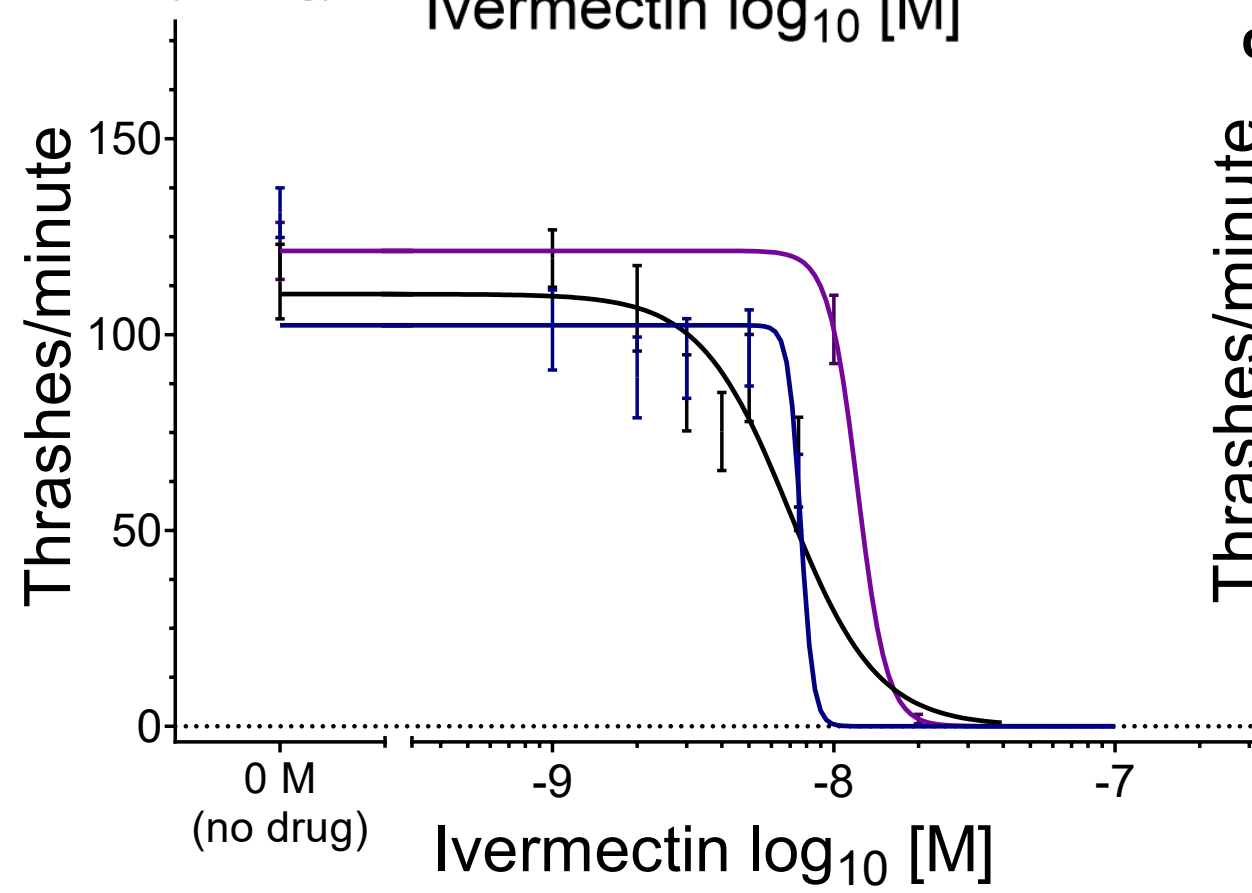**d**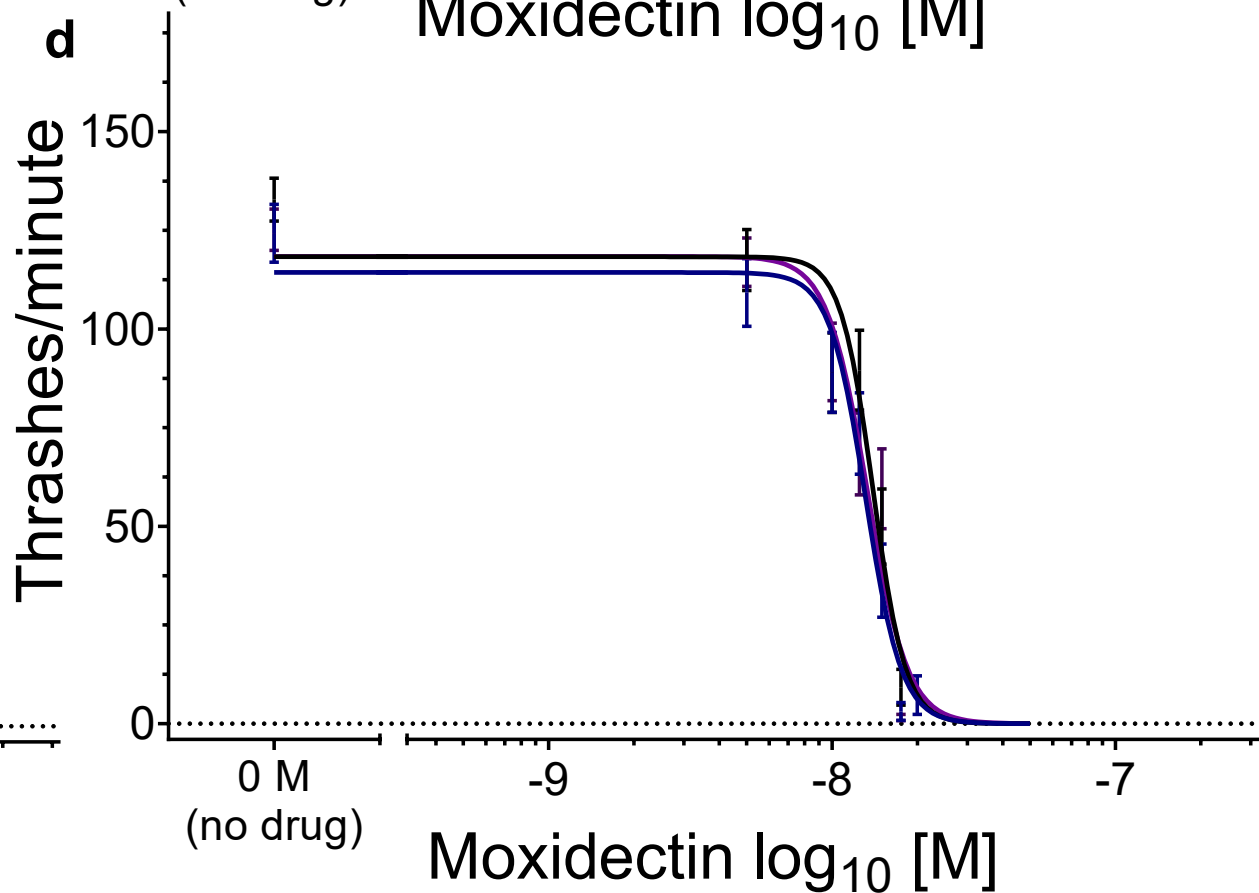

### **Supplementary Figure 1 Concentration-response curves for Intestine-Pgp-9 Line 2, wildtype and control strain**

Concentration response curves were calculated and visualized in GraphPad v8.3.0 based on motility response (thrashes/minute) following ivermectin or moxidectin incubation.

Concentrations were log<sub>10</sub> transformed after setting the negative control to 0.1 nM.

Concentrations response from four parameter non-linear regression models are visualized with the standard error of the mean at each concentration from 36 worms per concentration and condition. On the x-axis, the negative control was visualized as "0 M (no drug)" and separated by a break in the x-axis. Adult worms were incubated with a dilution series of ivermectin or moxidectin (final 1% DMSO concentration) for 24 hours under different conditions.

**a-b** Motility response following **a** – ivermectin or **b** – moxidectin incubation in the wildtype (WT) and the control strain with pharyngeal pumping stimulation (PP) by 5-HT (black – control, blue WT) or without PP stimulation (OP50<sup>-</sup>) (grey – control, purple – WT).

**c-d** Motility response following **c** – ivermectin or **d** – moxidectin incubation in the intestine line 2 in the presence of PP stimulation by OP50 bacteria (OP50<sup>+</sup> - blue) and serotonin (5-HT<sup>+</sup> - black), or in the absence of a stimulus for PP (OP50<sup>-</sup> - purple). Pgp: P-glycoprotein; 5-HT is 5-hydroxytryptamine; N2Δ*Ce*Pgp-9 is tm830 (NBRP); Transgenic strains genotypes: *EpiPgp-9Ex1* [*Cel-pgp-9(-)*; *Cel-col-19p::Pun-pgp-9::FLAG::Cel-unc-54\_3'-UTR*; *Cel-myo-2p::gfp::Cel-unc-54\_3'UTR*]; *IntPgp-9Ex1* and *IntPgp-9Ex2* [*Cel-pgp-9(-)*; *Cel-ges-1p::Pun-pgp-9::FLAG::Celunc-54\_3'-UTR*; *Cel-myo-2p::gfp::Cel-unc-54\_3'UTR*]; *CtrlEx1* [*Cel-pgp-9(-)*; *Cel-myo-2p::gfp::Cel-unc-54\_3'-UTR*]

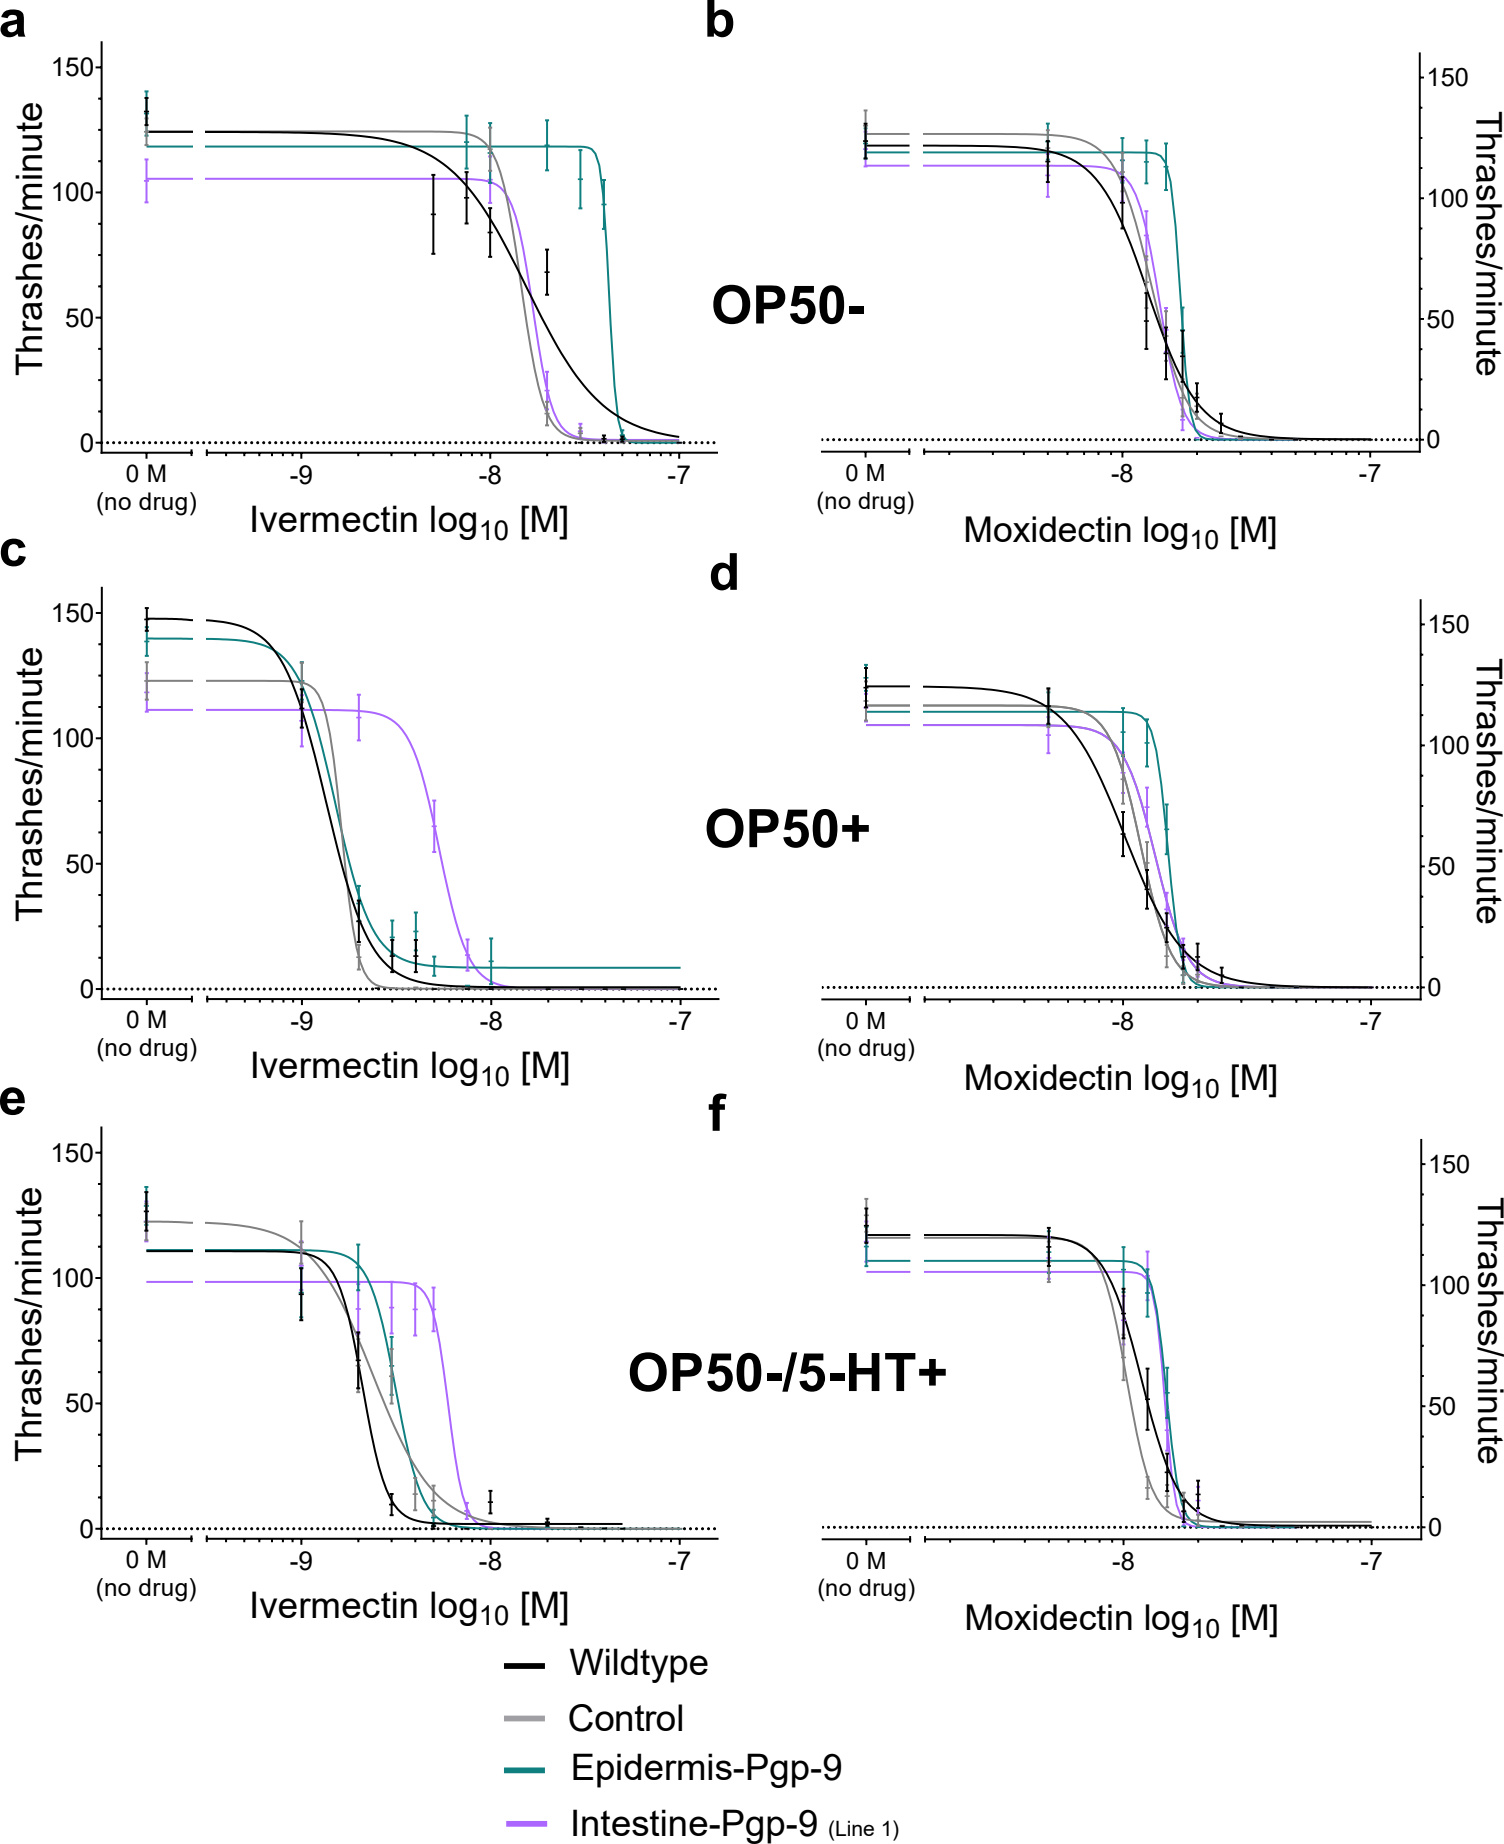

**Supplementary Figure 2. Concentration-response curves of *Parascaris univalens* Pgp-9 expressing transgenic, control and wildtype strains to ivermectin and moxidectin under different conditions**

Concentration-response curves for ivermectin (a,c,e) and moxidectin (b, d, f) calculated with GraphPad v8.0.0 were visualized for 4 different strains, wildtype (WT) (black), control strain (grey), hypodermis-Pgp-9 strain (turquoise) and intestine-Pgp-9 line 1 (purple). For each strain and concentration, 36 synchronized 1-day old adult worms spread equally on three separate days were incubated for 24 hours in S-medium in the absence of OP50 bacteria (OP50<sup>-</sup>) (a, b), in the presence of OP50 bacteria (OP50<sup>+</sup>) (c, d) stimulating pharyngeal pumping, or in the absence of OP50<sup>-</sup> but with pharyngeal pumping stimulation by 4 mM 5-hydroxytryptamine (OP50<sup>-</sup>/5-HT<sup>+</sup>) (e, f). Four parameter logistic regression models were calculated and visualized along with the mean of trashes/minute (body bends)  $\pm$  standard error of the mean at each concentration. Prior to the calculation, concentrations were log<sub>10</sub> transformed and the no drug negative control was set to 0.1 nM. On the x-axis, the negative control was visualized as "0 M (no drug)" and separated by a break in the axis. For both drugs a dilution series with a final DMSO concentration of 1% was used. Pgp-9: P-glycoprotein-9

**a**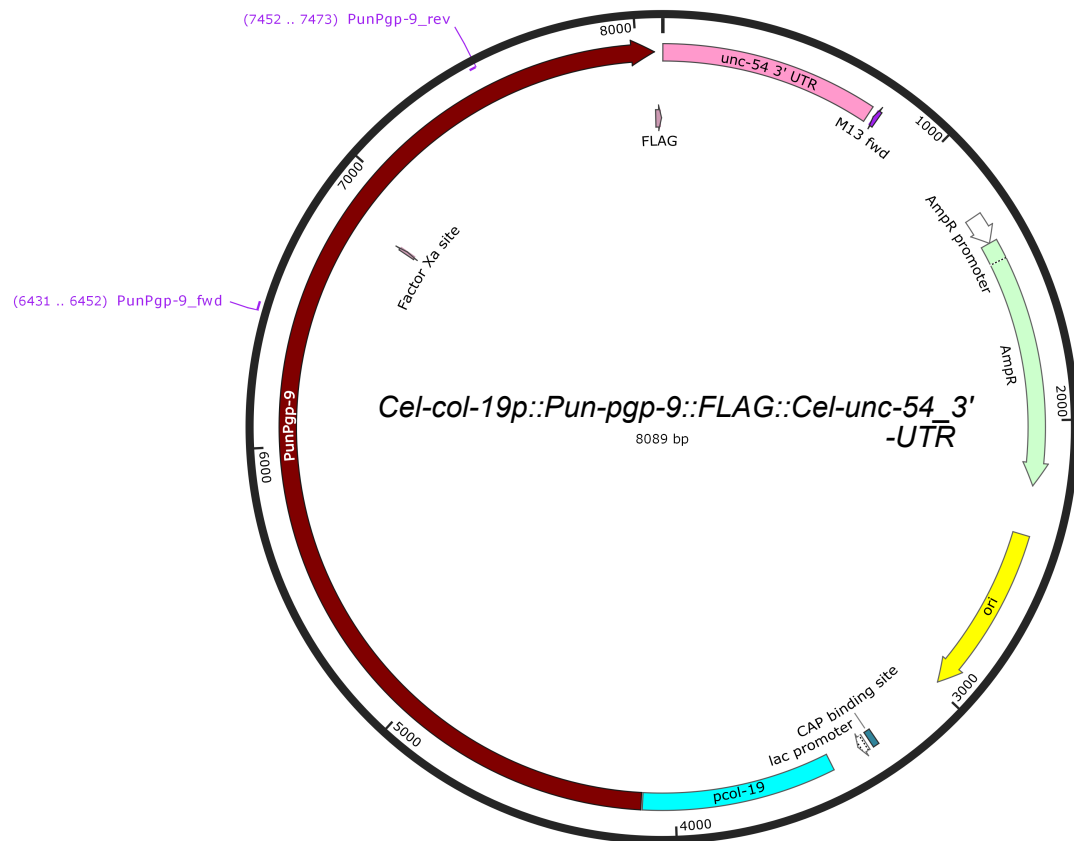**b**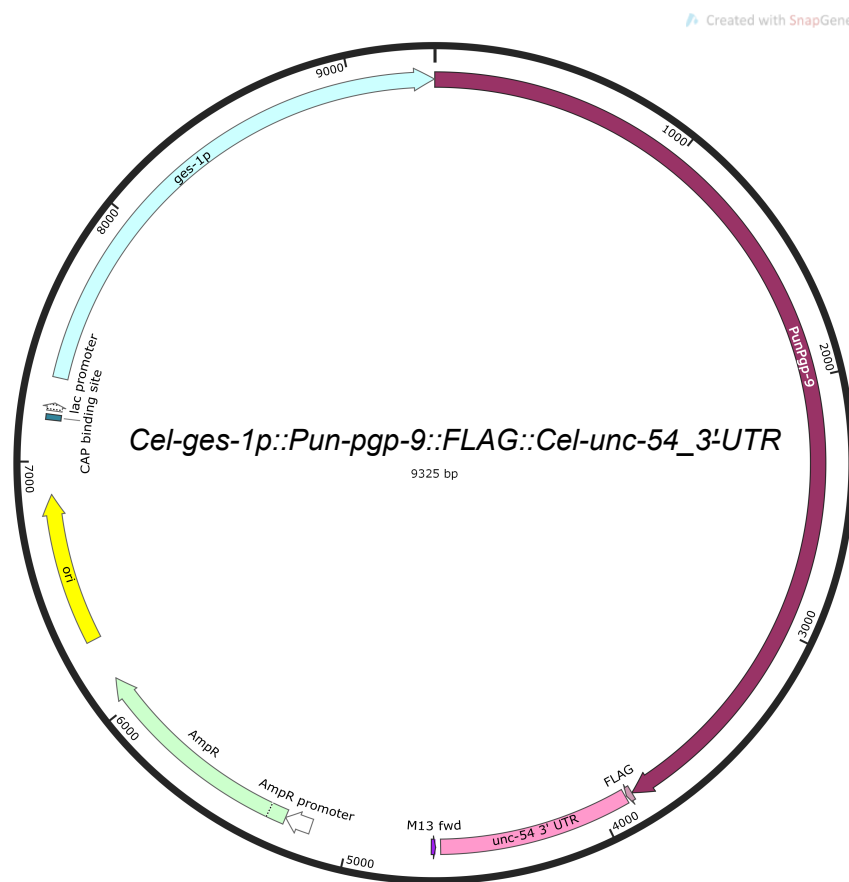

### Supplementary Figure 3 Vector maps of expression vectors

Vector maps of plasmids driving tissue specific *PunPgp-9* expression generated with SnapGene. The backbone vector puc-19 contains elements for transformation and selection in bacteria.

**(a)** *Cel-col-19p::Pun-pgp-9::FLAG::Cel-unc-54\_3'-UTR* driving epidermal *Pun-pgp-9* expression

**(b)** *Cel-ges-1p::Pun-pgp-9::FLAG::Cel-unc-54\_3'-UTR* driving intestinal *Pun-pgp-9*

*Pun-pgp-9* is *Parascaris univalens* P-glycoprotein-9; UTR: untranslated region;

FLAG: FLAG-tag GAC TAC AAA GAC GAT GAC or DYKDDDDK (protein sequence)

**Supplementary Table S1** Ivermectin concentration-response parameters of transgenic, control and wildtype strains at different conditions

| Back-ground Strain   | Strain (Genotype) <sup>a</sup>                      | <i>Pun</i> -PGP-9 expression | Condition         | EC <sub>50</sub> <sup>b</sup> (95% CI) [nM] | R <sup>2</sup> | Fold Change <sup>c</sup>         | p-value <sup>d</sup> |
|----------------------|-----------------------------------------------------|------------------------------|-------------------|---------------------------------------------|----------------|----------------------------------|----------------------|
| N2                   | WT                                                  | –                            | OP50 <sup>–</sup> | 16.68 (11.94-19.22)                         | 0.58           | 11.1 (WT OP50 <sup>+</sup> )     | 0.0014               |
|                      |                                                     |                              | OP50 <sup>+</sup> | 1.50 (1.41-1.61)                            | 0.78           | –                                |                      |
|                      |                                                     |                              | 5-HT <sup>+</sup> | 2.08 (1.97-2. 19)                           | 0.61           | 1.4 (WT OP50 <sup>+</sup> )      | 0.0014               |
| N2Δ <i>Cel-pgp-9</i> | Control                                             | –                            | OP50 <sup>–</sup> | 14.60 (12.79-16.67)                         | 0.81           | 0.9 (WT OP50 <sup>–</sup> )      | 1                    |
|                      |                                                     |                              | OP50 <sup>+</sup> | 1.51 (1.32-1.65)                            | 0.79           | 1.0 (WT OP50 <sup>+</sup> )      | 1                    |
|                      |                                                     |                              | 5-HT <sup>+</sup> | 2.37 (2.08-2.70)                            | 0.60           | 1.1 (WT 5-HT <sup>+</sup> )      | 1                    |
|                      | Epidermis-Pgp-9<br>( <i>EpiPgp-9Ex1</i> )           | Epidermis                    | OP50 <sup>–</sup> | 42.62 (38.20-47.54)                         | 0.46           | 2.9 (Control OP50 <sup>–</sup> ) | 0.0014               |
|                      |                                                     |                              | OP50 <sup>+</sup> | 1.53 (1.32-1.64)                            | 0.69           | 1.0 (Control OP50 <sup>+</sup> ) | 1                    |
|                      |                                                     |                              | 5-HT <sup>+</sup> | 3.16 (2.93 -3.41)                           | 0.65           | 1.3 (Control 5-HT <sup>+</sup> ) | 0.0014               |
|                      | Intestine-Pgp-9<br>Line 1<br>( <i>IntPgp-9Ex1</i> ) | Intestine                    | OP50 <sup>–</sup> | 18.29 (11.76-24.13)                         | 0.63           | 1.2 (Control OP50 <sup>–</sup> ) | 1                    |
|                      |                                                     |                              | OP50 <sup>+</sup> | 5.28 (4.81-5.84)                            | 0.58           | 3.5 (Control OP50 <sup>+</sup> ) | 0.0014               |
|                      |                                                     |                              | 5-HT <sup>+</sup> | 6.00 (5.14-7.04)                            | 0.41           | 2.5 (Control 5-HT <sup>+</sup> ) | 0.0014               |
|                      | Intestine-Pgp-9<br>Line 2<br>( <i>IntPgp-9Ex2</i> ) | Intestine                    | OP50 <sup>–</sup> | 12.95 (9.73-15.15)                          | 0.78           | 0.9 (Control OP50 <sup>–</sup> ) | 0.3102               |
|                      |                                                     |                              | OP50 <sup>+</sup> | 6.71 (4.77-9.44)                            | 0.42           | 4.4 (Control OP50 <sup>+</sup> ) | 0.0014               |
|                      |                                                     |                              | 5-HT <sup>+</sup> | 7.63 (6.88-8.46)                            | 0.59           | 3.2 (Control 5-HT <sup>+</sup> ) | 0.0014               |

Concentration-response parameters correspond to Figure 2C,E, Figure 3A-D and Figure 4.

<sup>a</sup>N2: N2 Bristol *C. elegans* strain; N2Δ*CelPgp-9*: *C. elegans* strain tm830; WT: wildtype (N2 Bristol *C. elegans* strain); Transgenic strains genotypes: *EpiPgp-9Ex1* [*Cel-pgp-9*(-); *Cel-col-19p*::*Pun-pgp-9*::*FLAG*::*Cel-unc-54\_3'*-UTR; *Cel-myo-2p*::*gfp*:: *Cel-unc-54\_3'*UTR]; *IntPgp-9Ex1* and *IntPgp-9Ex2* [*Cel-pgp-9*(-); *Cel-ges-1p*::*Pun-pgp-9*::*FLAG*::*Celunc-54\_3'*-UTR; *Cel-myo-2p*::*gfp*::*Cel-unc-54\_3'*UTR]; *CtrlEx1* [*Cel-pgp-9*(-); *Cel-myo-2p*::*gfp*::*Cel-unc-54\_3'*-UTR]

<sup>b</sup>EC<sub>50</sub>: half maximal effective concentration

<sup>c</sup>Fold changes were calculated by comparing the EC<sub>50</sub> of a strain and condition to the EC<sub>50</sub> of a respective control which is noted in brackets

<sup>d</sup>p-values were calculated by comparing a pair of non-linear regression models as listed in the fold-changes column using the extra-sum-of-squares-F test, and then adjusting p-values for multiple testing with the Bonferroni-Holm method in R

PGP/*pgp*: P-glycoprotein; CI: Confidence interval

**Supplementary Table S2.** Moxidectin concentration-response parameters of transgenic, control and wildtype strains at different conditions

| Back-ground Strain   | Strain (Genotype) <sup>a</sup>                | <i>Pun</i> -PGP-9 expression | Condition         | EC <sub>50</sub> <sup>b</sup> (95% CI) [nM] | R <sup>2</sup> | Fold Change <sup>c</sup>                                         | p-value <sup>d</sup> |
|----------------------|-----------------------------------------------|------------------------------|-------------------|---------------------------------------------|----------------|------------------------------------------------------------------|----------------------|
| N2                   | WT                                            | –                            | OP50 <sup>–</sup> | 12.67 (11.60-13.84)                         | 0.59           | 1.2 (WT OP50 <sup>+</sup> ) and 0.76 (IVM WT OP50 <sup>–</sup> ) | 0.0024 and 0.1367    |
|                      |                                               |                              | OP50 <sup>+</sup> | 10.19 (9.256-11.22)                         | 0.63           | 6.7 (IVM WT OP50 <sup>+</sup> )                                  | 0.0003               |
|                      |                                               |                              | 5-HT <sup>+</sup> | 11.85 (11.12-12.63)                         | 0.65           | 1.2 (WT OP50 <sup>+</sup> ) and 7.6 (IVM 5-HT <sup>+</sup> )     | 0.0196 and 0.0003    |
| N2Δ <i>Cel-pgp-9</i> | Control                                       | –                            | OP50 <sup>–</sup> | 13.13 (12.44-13.87)                         | 0.72           | 1.0 (WT OP50 <sup>–</sup> )                                      | 0.8892               |
|                      |                                               |                              | OP50 <sup>+</sup> | 11.61 (11.24-12.40)                         | 0.66           | 1.1 (WT OP50 <sup>+</sup> )                                      | 0.02                 |
|                      |                                               |                              | 5-HT <sup>+</sup> | 10.31 (9.93-10.72)                          | 0.71           | 0.9 (WT 5-HT <sup>+</sup> )                                      | 0.0016               |
|                      | Epidermis-Pgp-9 ( <i>EpiPgp-9Ex1</i> )        | Epidermis                    | OP50 <sup>–</sup> | 17.15 (16.74-17.56)                         | 0.69           | 1.3 (Control OP50 <sup>–</sup> )                                 | 0.0014               |
|                      |                                               |                              | OP50 <sup>+</sup> | 15.18 (14.79-15.58)                         | 0.69           | 1.3 (Control OP50 <sup>+</sup> )                                 | 0.0014               |
|                      |                                               |                              | 5-HT <sup>+</sup> | 14.91 (14.48-15.35)                         | 0.65           | 1.5 (Control 5-HT <sup>+</sup> )                                 | 0.0014               |
|                      | Intestine-Pgp-9 Line 1 ( <i>IntPgp-9Ex1</i> ) | Intestine                    | OP50 <sup>–</sup> | 13.31 (12.57-14.09)                         | 0.65           | 1.0 (Control OP50 <sup>–</sup> )                                 | 0.1179               |
|                      |                                               |                              | OP50 <sup>+</sup> | 13.96 (13.28-14.67)                         | 0.65           | 1.2 (Control OP50 <sup>+</sup> )                                 | 0.0016               |
|                      |                                               |                              | 5-HT <sup>+</sup> | 13.14 (12.39-13.93)                         | 0.59           | 1.3 (Control 5-HT <sup>+</sup> )                                 | 0.0014               |
|                      | Intestine-Pgp-9 Line 2 ( <i>IntPgp-9Ex2</i> ) | Intestine                    | OP50 <sup>–</sup> | 14.13 (13.53-14.76)                         | 0.62           | 1.1 (Control OP50 <sup>–</sup> )                                 | 0.8892               |
|                      |                                               |                              | OP50 <sup>+</sup> | 13.49 (12.84-14.18)                         | 0.58           | 1.2 (Control OP50 <sup>+</sup> )                                 | 0.0014               |
|                      |                                               |                              | 5-HT <sup>+</sup> | 14.67 (14.19-15.16)                         | 0.60           | 1.4 (Control 5-HT <sup>+</sup> )                                 | 0.0014               |

Concentration-response parameters correspond to Figure 2D, E, Figure 3A-D and Figure 4.

<sup>a</sup>N2: N2 Bristol *C. elegans* strain; N2Δ*CelPgp-9*: *C. elegans* strain tm830; WT: wildtype (N2 Bristol *C. elegans* strain); Transgenic strains genotypes: *EpiPgp-9Ex1* [*Cel-pgp-9(-)*; *Cel-col-19p::Pun-pgp-9::FLAG::Cel-unc-54\_3'-UTR*; *Cel-myo-2p::gfp:: Cel-unc-54\_3'UTR*]; *IntPgp-9Ex1* and *IntPgp-9Ex2* [*Cel-pgp-9(-)*; *Cel-ges-1p::Pun-pgp-9::FLAG::Celunc-54\_3'-UTR*; *Cel-myo-2p::gfp::Cel-unc-54\_3'UTR*]; *CtrlEx1* [*Cel-pgp-9(-)*; *Cel-myo-2p::gfp:: Cel-unc-54\_3'-UTR*]

<sup>b</sup>EC<sub>50</sub>: half maximal effective concentration

<sup>c</sup>Fold changes were calculated by comparing the EC<sub>50</sub> of a strain and condition to the EC<sub>50</sub> of a respective control which is noted in brackets

<sup>d</sup>p-values were calculated by comparing a pair of non-linear regression models as listed in the fold-changes column using the extra-sum-of-squares-F test, and then adjusting p-values for multiple testing with the Bonferroni-Holm method in R

PGP/*pgp*:: P-glycoprotein; CI: Confidence interval

## Supplementary Table 3 Primer

| Name                         | Direction | Purpose                          | Sequence (5'-3')                                                | Fragment Size (bp)* | Comment                                                                                                            |
|------------------------------|-----------|----------------------------------|-----------------------------------------------------------------|---------------------|--------------------------------------------------------------------------------------------------------------------|
| <i>Pun</i> -Pgp-9_fwd        | Forward   | RT-PCR                           | GATCAGATGCTCAGCAATGGTC                                          | 1043 bp             |                                                                                                                    |
| <i>Pun</i> -Pgp-9_rev        | Reverse   | RT-PCR                           | ACAGTTCCATCAATTGGGTCAT                                          |                     |                                                                                                                    |
| <i>Cel</i> -col-19p_fwd      | Forward   | Promotor amplification from gDNA | catttgaaaattgcaccaatgt                                          | 671 bp              |                                                                                                                    |
| <i>Cel</i> -col-19p_rev      | Reverse   |                                  | catcagttcatcaacatgcg                                            |                     |                                                                                                                    |
| <i>ges</i> -1p_puc19_ass_fwd | Forward   | Assembly                         | gtcgactctagaggatcccccactccgaactatgatg                           | 2000 bp             | Overlaps puc19 and <i>ges</i> -1p                                                                                  |
| <i>ges</i> -1p_puc19_ass_rev | Reverse   | Assembly                         | taatagacatctgaattcaaagataagatatgtaatag                          |                     | Overlaps <i>ges</i> -1p and <i>Pun</i> -pgp-9                                                                      |
| col-19p_puc19_ass_fwd        | Forward   | Assembly                         | gtcgactctagaggatcccccatttgaaaattgcaccaatg                       | 671 bp              | Overlaps puc19 and pcol-19                                                                                         |
| col-19p_puc19_ass_rev        | Reverse   | Assembly                         | taatagacatcgcatgttgatgaactgatg                                  |                     | Overlaps <i>col</i> -19p and <i>Pun</i> -pgp-9                                                                     |
| Pgp-9_pcol-19_ass_fwd        | Forward   | Assembly                         | tcaacatcgcatgtctattagatcgagtcac                                 |                     | Overlaps <i>col</i> -19p and <i>Pun</i> -pgp-9                                                                     |
| Pgp-9_pges-1_ass_fwd         | Forward   | Assembly                         | ttgaattcagatgtctattagatcgagtcac                                 |                     |                                                                                                                    |
| Pgp-9-FLAG_3UTR_ass_rev      | Reverse   | Assembly                         | tcacttatcatcatccttgtaatccatcgctgcatcaaagtc                      | 3972 bp             | Overlaps unc-54 3'UTR and Pgp-9_5'-end and integrates a FLAG-tag, combined with a primer overlapping each promotor |
| unc-54-5'_Pgp-9-FLAG_ass_fwd | Forward   | Assembly                         | gattacaaggatgatgatgataagtgaaggcccatctcgcccg                     | 748 bp              | Overlaps unc-54 3'UTR and Pgp-9_5'-end and integrates a FLAG-tag                                                   |
| unc-54-5'_ass_rev            | Reverse   | Assembly                         | tgaattcgagctcggtacccctgcaggaacacgttatgtttggtatattgggaatgtattctg |                     | Overlaps unc-54 3'UTR and puc19                                                                                    |

\*excluding flanking region of assembly primers

### Supplementary Table S3 Primers

Primers for RT-PCR and assembly of plasmid constructs. Assembly primers were generated with NEBuilder Assembly tool (New England Biolabs). *Pun*: *Parascaris univalens*. *Cel*: *Caenorhabditis elegans*. Pgp: P-glycoprotein. UTR: untranslated region; gDNA genomic DNA
